1 **Postmating sexual selection and the enigmatic jawed genitalia of**

2 ***Callosobruchus subinnotatus***

3

4 Merel M. van Haren<sup>1,2</sup>, Johanna Liljestrand Rönn<sup>1</sup>, Menno Schilthuizen<sup>2</sup>, Göran

5 Arnqvist<sup>1</sup>

6

7

8 <sup>1</sup>Department of Ecology and Genetics, Animal Ecology, Evolutionsbiologiskt Centrum

9 EBC, Norbyvägen 18 D, Uppsala University

10 <sup>2</sup>Naturalis Biodiversity Center, Darwinweg 2 2333 CR Leiden, Leiden University

11

## 12 **Summary**

13 Insect genitalia exhibit rapid divergent evolution. Truly extraordinary structures have  
14 evolved in some groups, presumably as a result of post-mating sexual selection. To  
15 increase our understanding of this phenomenon, we studied the function of one such  
16 structure. The male genitalia of *Callosobruchus subinnotatus* (Coleoptera: Bruchinae)  
17 contain a pair of jaw-like structures with unknown function. Here, we used phenotypic  
18 engineering to ablate the teeth on these jaws. We then experimentally assessed the  
19 effects of ablation of the genital jaws on mating duration, ejaculate weight, male  
20 fertilization success and female fecundity, using a double-mating experimental  
21 design. We predicted that copulatory wounding in females should be positively  
22 related to male fertilization success. However, we found no significant correlation  
23 between genital tract scarring in females and male fertilization success. Male  
24 fertilization success was, however, positively related to the amount of ejaculate  
25 transferred by males and negatively related to female ejaculate dumping. Ablation of  
26 male genital jaws did not affect male relative fertilization success but resulted in a  
27 reduction in female egg production. Our results suggest that postmating sexual  
28 selection in males indeed favors these genital jaws, but not primarily through an  
29 elevated relative success in sperm competition but by increasing female egg  
30 production.

31

32 **Keywords:** sexual selection, *Callosobruchus*, sperm competition, sexual conflict,  
33 genitalia

34

35 **Introduction**

36 Insect genitalia exhibit rapid divergent evolution (Hosken and Stockley, 2004;  
37 Eberhard, 2004; Eberhard, 2010). There is now little doubt that this is due to  
38 postmating sexual selection (Birkhead and Pizzari, 2002; Hosken and Stockley,  
39 2004; Arnqvist, 2014), generated either by conventional cryptic female choice (CFC)  
40 whereby female traits are evolving to gain benefits (Eberhard, 2006) or by sexually  
41 antagonistic coevolution (SAC) whereby female traits are evolving to minimize direct  
42 costs imposed by males (Arnqvist and Rowe, 2005). This coevolutionary process can  
43 result in the evolution of remarkable structures, such as prominent sclerotized  
44 structures of male genitalia that causes injuries to females. The function of these  
45 structures have only rarely been addressed, but can involve enabling copulations  
46 (Grieshop and Polak, 2012) or increasing male fertilization success by allowing  
47 passage of male seminal fluid (Kamimura, 2010; Hotzy et al., 2012).

48 Seed beetles are widely employed in studies of postcopulatory sexual selection and  
49 are well known for showing harmful male genital structures (Hotzy et al., 2012; Rönn  
50 et al., 2007; Sakurai et al., 2012) that damage the female copulatory tract.

51 *Callosobruchus subinnotatus* (Coleoptera, Bruchinae) is a seed beetle with a  
52 particularly interesting male genital morphology, as males are equipped with a pair of  
53 prominent sclerotized “jaws” (Fig.1).

54

55

56

57

58

59

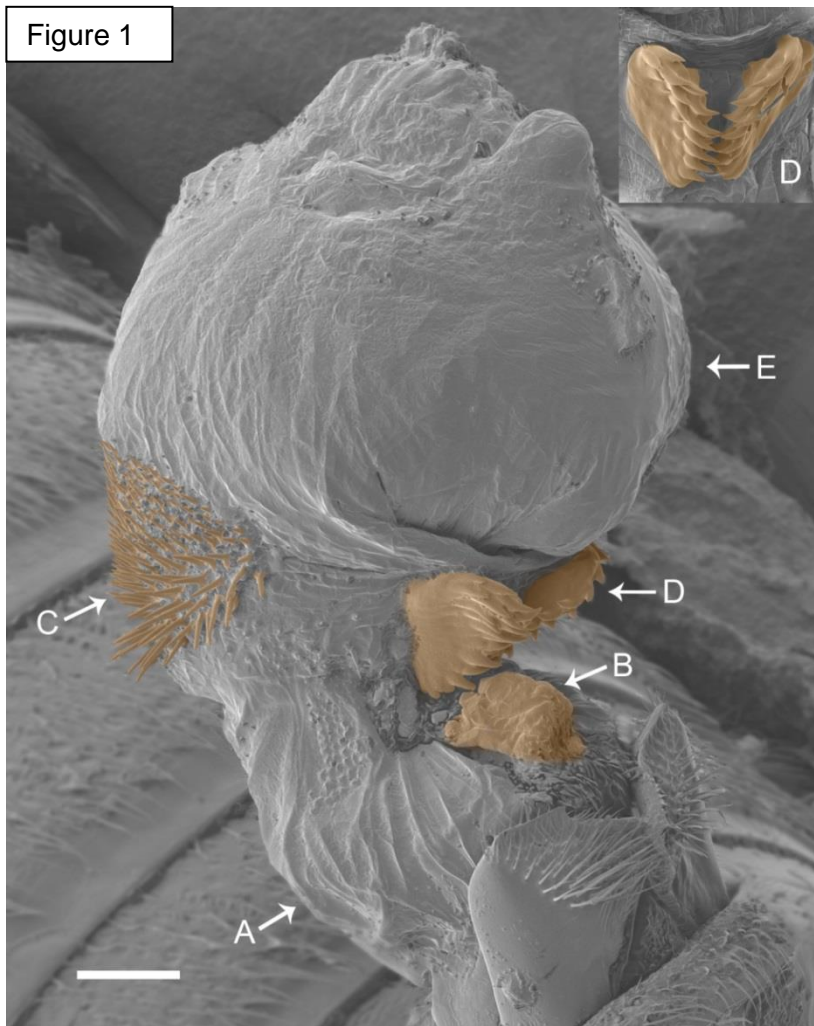

60 Fig. 1. **The remarkable male genitalia of *C. subinnotatus*.** During copulation, the genitalia unfolds which results in a  
61 reformation of its armature. This starts with the expansion of the base (A) of the endophallus. On top of this base sits a  
62 sclerotized structure, the basal structure (B), that appears as a thickened fold of the base of the endophallus. At this point, the  
63 dorsal spines (C) are clearly visible. The jaw-like structures on the ventral side (D) then join up, due to the expansion of the  
64 internal sac tip (E). At this point the jaws are closed and their position appear fixed. The endophallus is distinct from that in other  
65 seed beetle species (Rönn et al. 2007). The figure shows an endophallus fixated by critical point drying to prevent tissue from  
66 collapsing. Scale bar represents 100µm.

67

68 To better understand the evolution of such genetal structures, we performed a series  
69 of experiments aimed at unveiling the ultimate function of these genetal jaws. The  
70 jaws clearly cause injury to females: the copulatory duct is abraded or even pierced  
71 by the jaws, leaving a v-shaped pattern of melanized scars (Fig. 2).

72

Figure 2

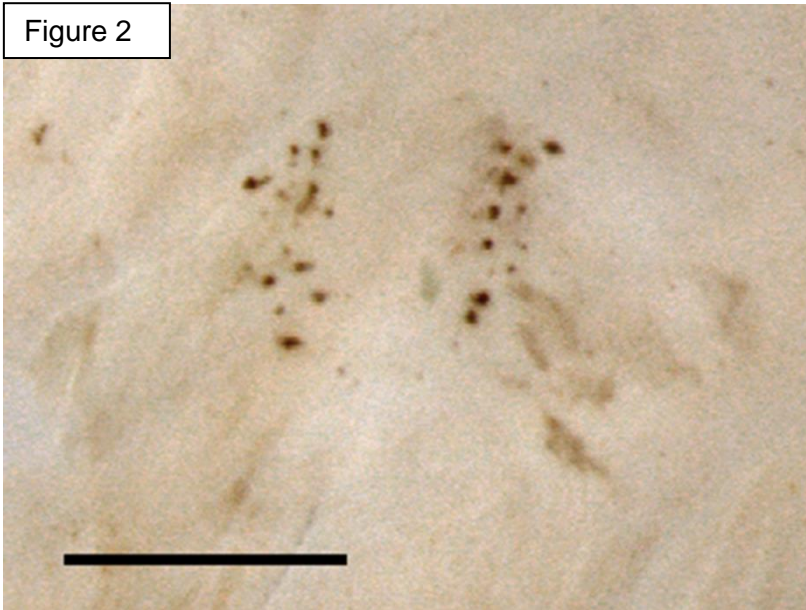

73

74 Fig. 2. The V-shaped scarring pattern caused by the jaw-like structures in the copulatory duct of females. Scale bar is  
75 200 $\mu$ m.

76

77 We hypothesized that the genital jaws may either (1) serve as a holdfast device or (2)  
78 may elevate male fertilization success by other means, as it is the case in the closely  
79 related species *C. maculatus* (Hotzy and Arnqvist, 2009; Hotzy et al., 2012). Here,  
80 we used phenotypic engineering to experimentally manipulate this structure. The  
81 paired genital jaws bear spiny teeth-like protrusions (Fig. 1) which formed the target  
82 of our manipulation: to smoothen the teeth by abrasion. A complete removal of the  
83 jaws would have been interesting, but was impossible as it would have caused  
84 detrimental hemorrhage.

85

## 86 **Materials and Methods**

87 Beetles were mass cultured in the laboratory on a 12:12 h L:D photoperiod, 55% RH  
88 and a temperature of 29°C in 1000 mL glass bottles (N=3), containing 250ml black  
89 eyed-beans (*Vigna unguiculata*) per generation. New generations were set by mixing  
90 beetles from each of the jars, to avoid inbreeding (Appleby and Credland, 2001). To

91 generate virgin individuals, beans with eggs were isolated individually in 24 well  
92 tissue culture plates. Beetles used in the experiments described below were all of <  
93 48 hours adult age and were kept individually under aphagy in aerated 5ml  
94 Eppendorf tubes prior to the experiment.

95

#### 96 *Treatment of males*

97 To assess the function of the jaw-like structures, their teeth were smoothed  
98 manually following the eversion of their genitalia (Fig. 3).

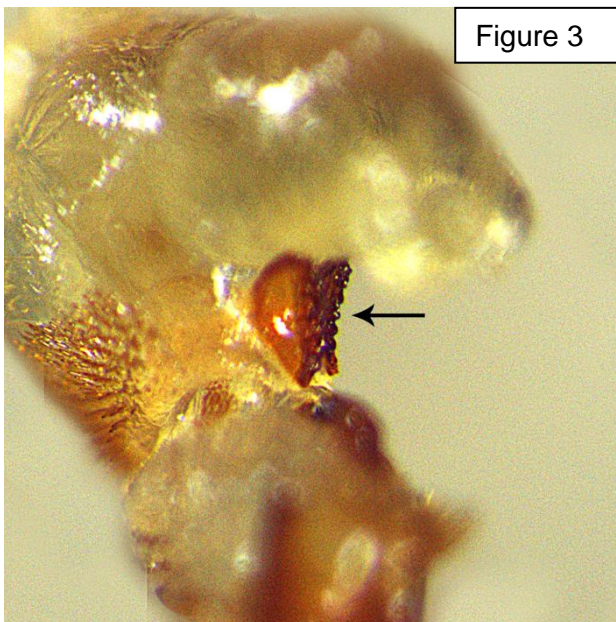

99

100 Fig. 3. **The endophallus of a *C. subinnotatus* male with smoothed teeth.** Scale bar is not available, but for references the  
101 jaws are approximately 100µm.

102

103 The treatment was performed with a file made of a dentist drill (Two striper L201MF3)  
104 attached to a probe. To smoothen the teeth, the jaws of lightly anesthetized (CO<sub>2</sub>)  
105 males were held in position with a forceps (SS 11200-33 Dumoxel®-Biology CE)  
106 (Fig. 4) under a dissecting microscope. All male treatments (see below) were  
107 performed with the same method and materials.

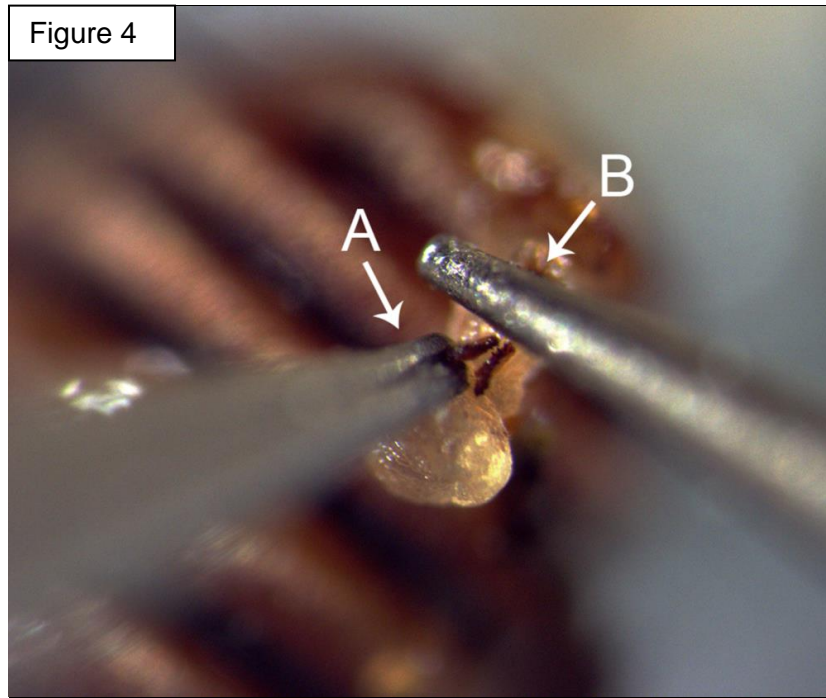

108

109 Fig. 4. **The manipulation of the jaws.** A male with everted endophallus is fixed with its elytra on blue-tack. The jaws are held in  
110 position with a forceps (A) and then filed down using a dentist drill (B). Scale bar is not available, but for references the jaws are  
111 approximately 100 $\mu$ m.

112

113 Our experimental design included four treatment groups (see Figure 5 for sample  
114 sizes). [A] Some males had the teeth of their genital jaws smoothed – we refer to  
115 this as the ablated jaws males (AJ). Three different control groups were created. [B]  
116 One group of males were not manipulated in any way, but were left untouched (Non).  
117 This group controls for potential effects of CO<sub>2</sub> anesthesia and genital eversion. To  
118 control for ablation per se, two additional control groups were created. [C] One group  
119 were treated as AJ males in every respect but instead had another structure of their  
120 genitalia ablated, namely the right paramere (APa). [D] The final group of males were  
121 also treated as AJ males in every respect but served as a surgical control in the  
122 sense that they had a non-genitalic structure ablated, namely the rim of the pygidium  
123 (APy) (Fig. S1).

124

125 Focal males were thus treated 18 hours before they were used in the experiments  
126 described below. During the treatment, beetles were lightly anesthetized with CO<sub>2</sub> up  
127 to a period of seven minutes by placing them on a FlyStuff Flypad. Virgin reference  
128 males were sterilized by irradiating them with a 100 Gy dose from a cesium-137  
129 source. This sterilization technique has been shown to cause lasting sterility in male  
130 seed beetles while not compromising male copulation ability and sperm  
131 competitive ability (Eady, 1991; Maklakov and Arnqvist, 2009). After the treatment,  
132 males were placed in a 6cm petri dish with access to 5ml sugar water solution to  
133 recover.

134

#### 135 *Treatment of females*

136 Females resist mating, prior to and during copulations, by kicking males with their  
137 hind legs and this might affect male fertilization success (Maklakov and Arnqvist,  
138 2009). To assess the influence of female hind leg kicking on the effects of the above  
139 male treatment, we also manipulated all females involved in matings with AJ and Non  
140 males (not those mated to APa and APy males). One hour before the mating  
141 experiment, half of the females were put on ice where the hind tibia were ablated with  
142 micro scissors halfway. This renders females unable to reach, and thus resist, males  
143 (Crudginton and Siva-Jothy, 2000; Edvardsson and Tregenza, 2005; Maklakov and  
144 Arnqvist, 2009). To control for the effect of ablation, the other half of all females were  
145 left having intact hind legs during mating but instead had their hind legs ablated one  
146 hour after mating with the focal male.

147

#### 148 *Mating experiments*



149 We measured eight different aspects of reproductive response to the genital jaw  
150 manipulation: mating duration, male ejaculate weight, female ejaculate dumping, the  
151 amount of scarring caused in the female copulatory duct, male offensive sperm  
152 competition success, male defensive sperm competition success and female  
153 fecundity. Moreover, the effect of female kicking during mating on these responses  
154 was assessed.

155

156 The above reproductive responses were based on a series of standard double-  
157 mating experiments in which both defense (P1) and offense (P2) components of  
158 sperm competition success were measured using a standard sterile male technique  
159 (Boorman and Parker, 1976; Simmons, 2001). Here, females were mated with two  
160 males in succession, one of which was irradiated such that his sperm remain motile  
161 and fully able to fertilize eggs but carry lethal mutations that render the eggs inviable  
162 and the other male was focal and fertile. Here, P1 and P2 denote the proportion of  
163 offspring that is fertilized by the focal male when he is first or second to mate,  
164 respectively, with a given female in such a double mating experiment. Briefly, focal  
165 experimental males, sterile reference males and females were first weighed on a  
166 balance (Sartorius ME235S Genius). Mating couples were then immediately  
167 introduced in pairs in 6cm petri dishes and placed in dark climate chambers under  
168 rearing conditions, during very early morning which represents the peak mating time  
169 *C. subinnotatus* (MBata et al., 1997). The initiation and termination of mating were  
170 recorded. Pairs that did not mate within 90 minutes were discarded. After mating,  
171 both male and female were weighed a second time. Females were placed individually  
172 in 10cm petri dishes with +/- 40 beans and access to 5ml sugar water solution and  
173 were stored in climate chambers for 48 hours. Following this intermating interval,

174 females were remated to a second male following the same protocol as for the first  
175 mating. In the sperm offense assays (P2), the first male was a sterile reference male  
176 and the second male was a focal experimental male. In the sperm defense assays  
177 (P1), this order was reversed. The petri dish with beans and eggs from the  
178 intermating interval was incubated for 10 days in a climate chamber, after which all  
179 hatched and unhatched eggs were counted.

180

181 Male weight loss during mating provides a measure of male ejaculate weight in these  
182 insects (Savalli and Fox, 1998; Rönn et al., 2008). The reduction in male weight  
183 during copulation was significantly correlated with the increase in female weight  
184 across all matings ( $r = 0.39$ ,  $P < 0.001$ ,  $N = 326$ ). The fact that the correlation was not  
185 stronger is primarily due to partial ejaculate dumping immediately after copulation by  
186 females, a phenomenon common in seed beetles (Booksmythe et al., 2014) as well  
187 as in insects in general (Perry and Rowe, 2008). In our experiments, mean male  
188 weight loss was on average  $18.2 \times 10^{-5}$  g and mean female weight gain was on  
189 average  $12.7 \times 10^{-5}$  g (paired  $t$ -test:  $t_{325} = 8.55$ ,  $P < 0.001$ ), suggesting that females  
190 dump some 30% of the ejaculate on average. Here, we thus used male weight loss  
191 as a measure of ejaculate weight and the difference between male weight loss and  
192 female weight gain as a measure of female ejaculate dumping.

193

194 Following the second mating, the females were placed in new petri dishes provided  
195 with ca. 40 black-eyed beans and a 5ml Eppendorf tube containing sugar water and  
196 was allowed 7 days to lay eggs and heal copulatory injuries. After this time, females  
197 were frozen ( $-21^{\circ}\text{C}$ ). After incubation for another ten days, the petri dishes containing  
198 eggs on beans were also frozen, to prevent beetles from hatching. All eggs were

199 subsequently counted and we recorded whether each egg was hatched or  
200 unhatched. Female were subsequently thawed and the copulatory duct and the bursa  
201 copulatrix was separated from the female abdomen, cut open and placed on a  
202 microscopic slide, enclosed in glycerin, and covered with a cover slip. The  
203 dissections were performed under a Leica M165C microscope. A photo was taken of  
204 the dissected bursa with a motorized Zeiss V20 with MRc5 camera and Axiovision  
205 software. The images were subsequently analyzed in ImageJ. The image was  
206 adjusted into an 8bit format and a threshold was set to distinguish scar tissue from  
207 non-scar tissue. We quantified scarring in females as both the number of scars and  
208 the area covered by scars, expressed in pixels. All scars were included, since it is not  
209 possible to unambiguously distinguish between scars caused by the genital jaws and  
210 other types of genital spines (Fig. 1).

211

## 212 ***Statistical analyses***

213 In our main models, we modelled the fertilization/reproductive success of the focal  
214 male, using his mating order (first [P1] or second [P2]) as factor. For fertilization  
215 success, we employed generalized linear models of the number of hatched eggs,  
216 using binomial errors with a complementary log-log link function and an empirically  
217 derived dispersion parameter where the total number of eggs laid after the second  
218 mating was used as the binomial denominator. Conventional general linear models  
219 were used for other inferences. Inferential models included our factorial variables  
220 (P1/P2, male treatment, female treatment) and any covariates with noticeable effects.  
221 Interactions were only included when statistically significant. Potential covariates  
222 included body weight of males and females, ejaculate size, sperm dumping, mating  
223 duration, scarring in females and the number of eggs laid by females between

224 matings. Models of the effects of female leg treatment were restricted to include only  
225 AJ and Non males (see above). Four females that laid <4 eggs after the second  
226 mating were excluded from our data set. In addition, two observations with  
227 standardized residuals >4 were excluded from the analyses of scarring in females.  
228 Analyses were performed with Genstat v.18 and Systat v.13.

## 229 **Results**

230 The overall fertilization success of the last male to mate, i.e. P2, was approximately  
231 0.68 in *C. subinnotatus*. The model predictions, adjusted for covariates, were P1 =  
232 0.39 (SE = 0.03) and P2 = 0.76 (SE = 0.03) but both of these values are likely  
233 somewhat inflated as a result of a slight competitive advantage of normal sperm over  
234 irradiated sperm.

235  
236 Our inferential model of variation in male fertilization success (Table 1) was highly  
237 significant overall ( $F_{11,146} = 7.73$ ,  $P < 0.001$ ). However, male genital treatment had no  
238 significant effect on male fertilization success under sperm competition, measured as  
239 the proportion of a female's offspring fertilized by the focal male, but both ejaculate  
240 weights and ejaculate dumping by females was associated with male fertilization  
241 success (Table 1). Interestingly, focal male fertilization success increased with his  
242 ejaculate weight ( $\beta' = 0.04$ ,  $SE_{\beta} = 0.01$ ) and decreased with female ejaculate  
243 dumping ( $\beta' = -0.02$ ,  $SE_{\beta} = 0.01$ ). We found no significant effect of female leg  
244 treatment or any other covariates on male fertilization success.

245  
246 **Table 1.** Analysis of deviance of a generalized linear model of variation in male fertilization success under sperm competition in  
247 our double-mating experiment.

248

| Source                          | DF  | Deviance | Deviance ratio | <i>P</i> (from <i>F</i> ) |
|---------------------------------|-----|----------|----------------|---------------------------|
| P1/P2                           | 1   | 845.83   | 56.08          | <0.001                    |
| Male treatment                  | 3   | 99.65    | 2.20           | 0.090                     |
| P1/P2 × male treatment          | 3   | 59.97    | 1.33           | 0.268                     |
| Eggs laid between matings       | 1   | 26.91    | 1.78           | 0.184                     |
| Focal male ejaculate weight     | 1   | 103.48   | 6.86           | 0.010                     |
| Reference male ejaculate weight | 1   | 85.42    | 5.66           | 0.019                     |
| Ejaculate dumping               | 1   | 61.32    | 4.07           | 0.046                     |
| Residual                        | 146 | 2202.11  |                |                           |

249

250 A two-way linear model of variation in mating duration showed that males mated  
251 somewhat longer when mating as a female's first (24.3 min) compared to second  
252 (21.2 min) mate ( $F_{1,104} = 4.24$ ,  $P = 0.042$ ), and that females with ablated hind-legs  
253 mated for longer (24.3 vs. 21.2 min) ( $F_{1,104} = 4.40$ ,  $P = 0.038$ ), although male genital  
254 treatment had no significant effect on mating duration ( $F_{1,104} = 0.02$ ,  $P = 0.89$ ). An  
255 analogous model of variation in male ejaculate weight showed that larger males  
256 transfer heavier ejaculates ( $F_{1,103} = 6.46$ ,  $P = 0.013$ ), while P1/P2, female treatment  
257 and male treatment had no significant effects (all  $P > 0.145$ ). Interestingly, a model of  
258 female sperm dumping, simultaneously including both focal male body and ejaculate  
259 weight, showed that females dumped more ejaculate from relatively small males ( $\beta' =$   
260  $-0.019$ ,  $SE_{\beta} = 0.004$ ;  $F_{1,102} = 22.2$ ,  $P < 0.001$ ) with relatively large ejaculates ( $\beta' =$   
261  $1.29$ ,  $SE_{\beta} = 0.09$ ;  $F_{1,102} = 215.9$ ,  $P < 0.001$ ), but showed no effects of P1/P2, female  
262 treatment or male treatment (all  $P > 0.082$ ).

263

264 A model of the number of scars in females, including the mating duration of both  
265 matings, revealed that the mating duration of the reference male ( $F_{1,100} = 4.51$ ,  $P =$   
266  $0.036$ ) was positively related to scarring and that females with ablated hind legs  
267 suffered fewer scars on average (136.2,  $SE = 7.7$ ) than did females with intact hind  
268 legs (167.8,  $SE = 8.3$ ) ( $F_{1,100} = 7.45$ ,  $P = 0.007$ ) but showed no effect of male  
269 treatment ( $F_{1,100} = 1.94$ ,  $P = 0.166$ ), suggesting that female resistance during  
270 copulation increases copulatory wounding. We failed to find any significant effects of  
271 any predictors on the area of scarring in females.

272

273 Female fecundity, i.e. the total number of eggs laid during our experiment, was  
274 positively associated with mating duration and tended to be positively related to  
275 ejaculate weight (Table 2). Notably, female fecundity was also affected by male  
276 genital treatment (Table 1), such that females laid fewer eggs if her focal male mate  
277 had ablated genital jaws (Fig. 5). This was true also in a reduced model, involving  
278 only AJ and Non males, where male treatment had a significant effect ( $F_{1,96} = 4.41$ ,  $P$   
279  $= 0.038$ ) while P1/P2, female treatment and their interaction had no significant effects  
280 ( $P > 0.074$  in all cases).

281

282 **Table 2.** Analysis of variance of female fecundity.

| <b>Source</b>                   | <b>DF</b> | <b>MS</b> | <b>F</b> | <b>P</b> |
|---------------------------------|-----------|-----------|----------|----------|
| Male treatment                  | 3         | 1562.8    | 3.0      | 0.032    |
| P1/P2                           | 1         | 328.6     | 0.6      | 0.428    |
| Focal male ejaculate weight     | 1         | 594.5     | 1.1      | 0.287    |
| Reference male ejaculate weight | 1         | 894.7     | 1.7      | 0.192    |

| Source                         | DF  | MS     | F   | P     |
|--------------------------------|-----|--------|-----|-------|
| Focal male mating duration     | 1   | 6.4    | 0.0 | 0.912 |
| Reference male mating duration | 1   | 2135.3 | 4.1 | 0.044 |
| Residual                       | 148 | 519.8  |     |       |

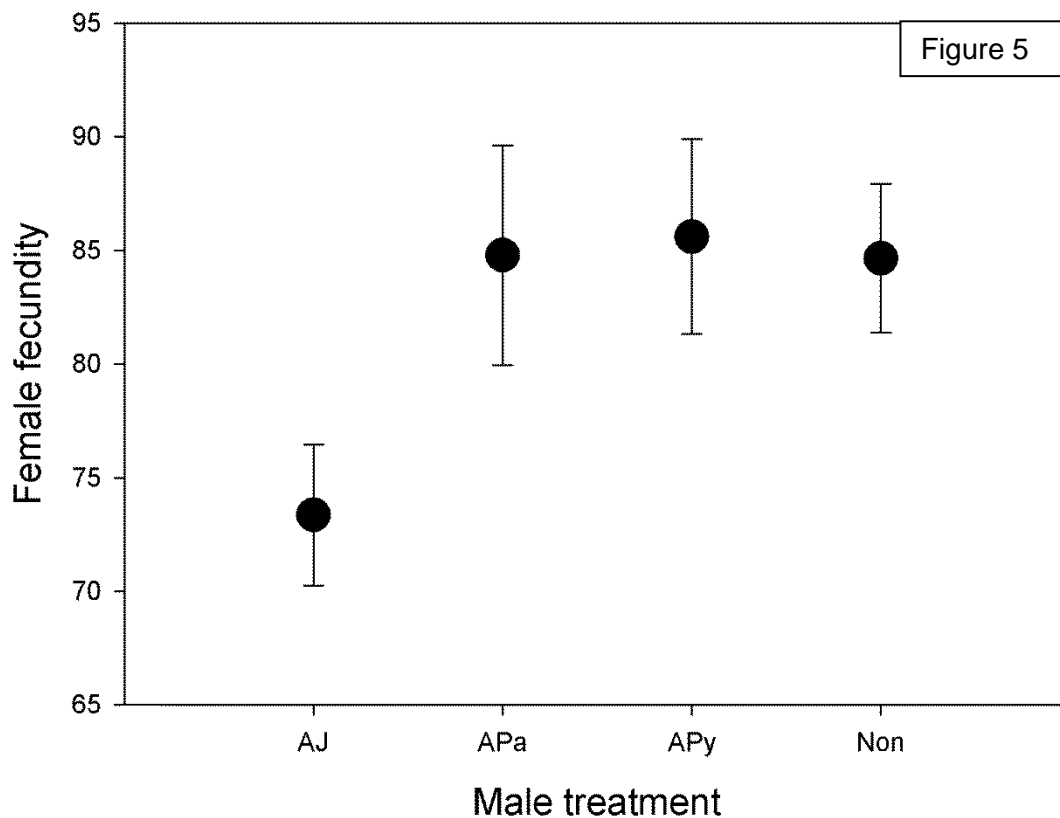

283

284 Fig. 5. **The total number of eggs laid by females.** Females laid fewer eggs if one of her mates had ablated  
285 genital jaws (AJ) (GLM:  $F_{3,148} = 3.01$ ,  $P = 0.032$ .  $N=55$  for AJ,  $N=23$  for APa,  $N=29$  for APy, and  $N=50$  for Non),  
286 compared to mates from the control groups. Shown is marginal mean ( $\pm$ SE) number of eggs.

## 287 Discussion

288 In contrast to the studies of the congener *C. maculatus* by Hotzy and Arnqvist (2009)  
289 and Hotzy et al. (2012), we found no significant effects of experimental ablation of  
290 genital spines on male fertilization success in *C. subinnotatus*. Instead, fertilization

291 success was determined primarily by male ejaculate weight and the degree to which  
292 females dumped the ejaculate after mating. This suggests that females may affect  
293 male fertilization success, by differential uptake of male seminal fluid from relatively  
294 large males (Eberhard, 1996). Most importantly, we found that females laid fewer  
295 eggs following mating with males with ablated genital jaws, suggesting that this  
296 structure may ultimately function to stimulate female egg production more than  
297 female sperm use.

298

299 Hotzy et al. (2012) found that male seminal fluid is transported across the walls of the  
300 copulatory tract less rapidly in males with ablated genital spines and that such males  
301 suffer reduced fertilization success as a result. Our results suggest that the genital  
302 jaws of *C. subinnotatus* may also affect female uptake of male seminal fluid, although  
303 this may then be manifested as elevated female egg production in this species. We  
304 note that that male seminal fluid in seed beetles contains a very large number of  
305 proteins, some of which affect male fertilization success and others that affect female  
306 egg production (Goenaga et al., 2015; Yamane et al., 2015; Bayram et al., 2017).  
307 Needless to say, given everything else equal, male postmating reproductive success  
308 is elevated by an increase in female egg production (Arnqvist and Rowe, 2005).  
309 Thus, our results provide support for a role of postmating sexual selection in the  
310 evolution of the genital jaws in *C. subinnotatus*, although the proximate mechanism is  
311 somewhat unclear and may differ somewhat from that seen in *C. maculatus* (Hotzy  
312 and Arnqvist, 2009; Hotzy et al, 2012). It is interesting to note that the fact that male  
313 ejaculate weight and the degree to which females dump ejaculate after mating  
314 determines male fertilization success is consistent with an important role for seminal  
315 fluid in mediating male postmating reproductive success also in *C. subinnotatus*.



316

317 We found that mating duration was positively associated with scarring in females, as  
318 has previously documented in *C. maculatus* (Crudginton and Siva-Jothy, 2000), and  
319 that females that were made unable to resist males by kicking suffered less scars.  
320 This shows that the physical act of resistance by females actually acts to aggravate  
321 the injuries they sustain during copulation. Ablation of genital spines decreases the  
322 amount of scarring suffered by female in *C. maculatus* (Hotzy and Arnqvist, 2009;  
323 Hotzy et al., 2012), but we found no significant effect of genital jaw ablation in *C.*  
324 *subinnotatus*. It is possible that our ablation treatment was too subtle to generate an  
325 effect on scarring in females strong enough for detection, in the face of rather  
326 extensive scarring in females caused by other genital spines.

327

328 Although it is certainly possible that the enigmatic genital jaws of male *C.*  
329 *subinnotatus* serves additional functions, we show here that spines on these jaws act  
330 to increase female egg production rate and are hence favored by postmating sexual  
331 selection. Whether sexually antagonistic coevolution has been involved in their  
332 elaboration is, however, less clear since sexual conflict relies on the demonstration of  
333 direct costs to females (Arnqvist and Rowe, 2005; Fricke et al., 2009). An elevation of  
334 egg production rate may come at a nest cost to females (Arnqvist and Rowe 2005),  
335 but this depends on how increased the rate of egg production trades-off with other  
336 fitness components (Rönn et al., 2006). Similarly, our experiments suggest that the  
337 increased scarring caused by the genital jaws is relatively marginal and direct costs  
338 to females may thus be minor. Additional studies are required to further clarify the  
339 role of the genital jaws in *C. subinnotatus* and to assess the degree to which this  
340 remarkable structure is detrimental to females.

341 **References**

342

343 **Appleby, J. H. and Credland, P. F.** (2001). Bionomics and polymorphism in  
344 *Callosobruchus subinnotatus* (Coleoptera: Bruchidae). *Bulletin of entomological*  
345 *research*. **91(4)**, 235-244.

346 **Arnqvist, G.** (2014). Cryptic female choice. In *The Evolution of Insect Mating*  
347 *Systems* (ed. D. Shuker and L. Simmons), pp. 204-220. Oxford University Press.

348 **Arnqvist, G. and Rowe, L.** (2005). *Sexual Conflict*. Princeton, New Jersey:  
349 Princeton University Press.

350 **Bayram, H., Sayadi, A., Goenaga, J., Immonen, E. and Arnqvist, G.** (2017). Novel  
351 seminal fluid proteins in the seed beetle *Callosobruchus maculatus* identified by a  
352 proteomic and transcriptomic approach. *Insect Mol. Biol.* **26**, 58–73.

353 **Birkhead, T. R. and Pizzari, T.** (2002). Postcopulatory sexual selection. *Nature*  
354 *Reviews Genetics*. **3(4)**, 262-273.

355 **Booksmythe, I., Fritzsche, K., and Arnqvist, G.** (2014). Sperm competition  
356 generates evolution of increased paternal investment in a sex role-reversed seed  
357 beetle. *Journal of evolutionary biology*. **27(12)**, 2841-2849.

358 **Boorman, E. and Parker, G.A.** (1976). Sperm (ejaculate) competition in *Drosophila*  
359 *melanogaster*, and the reproductive value of females to males in relation to female  
360 age and mating status. *Ecol Entomol.* **1**, 145–155.

361 **Crudgington, H.S. and Siva-Jothy, M.T.** (2000). Genital damage, kicking and early  
362 death - the battle of the sexes takes a sinister turn in the bean weevil. *Nature*. **407**,  
363 855–856.

- 364 **Eady, P. E.** (1991). Sperm competition in *Callosobruchus maculatus* (Coleoptera:  
365 Bruchidae): a comparison of two methods used to estimate paternity. *Ecol. Entomol.*  
366 **16**, 45–53.
- 367 **Eberhard, W. G.** (1996). *Female control: sexual selection by cryptic female choice*.  
368 Princeton University Press.
- 369 **Eberhard, W. G.** (2004). Rapid divergent evolution of sexual morphology:  
370 comparative tests of antagonistic coevolution and traditional female choice.  
371 *Evolution*. **58(9)**, 1947-1970.
- 372 **Eberhard, W. G.** (2006). Sexually antagonistic coevolution in insects is associated  
373 with only limited morphological diversity. *Journal of evolutionary biology*. **19(3)**, 657-  
374 681.
- 375 **Eberhard, W. G.** (2010). Evolution of genitalia: theories, evidence, and new  
376 directions. *Genetica*. **138(1)**, 5-18.
- 377 **Edvardsson, M. and Tregenza, T.** (2005). Why do male *Callosobruchus maculatus*  
378 harm their mates?. *Behavioral Ecology*. **16(4)**, 788-793.
- 379 **Fricke, C., Perry, J., Chapman, T., and Rowe, L.** (2009). The conditional  
380 economics of sexual conflict. *Biology Letters*. **5(5)**, 671-674.
- 381 **Goenaga, J., Yamane, T., Rönn, J. and Arnqvist, G.** (2015). Within-species  
382 divergence in the seminal fluid proteome and its effect on male and female  
383 reproduction in a beetle. *BMC Evolutionary Biology*. **15**, 266.
- 384 **Grieshop, K. and Polak, M.** (2012). The precopulatory function of male genital  
385 spines in *Drosophila ananassae* [Doleschall](Diptera: Drosophilidae) revealed by  
386 laser surgery. *Evolution*. **66(8)**, 2637-2645.
- 387 **Hosken, D. J. and Stockley, P.** (2004). Sexual selection and genital evolution.  
388 *Trends in Ecology and Evolution*. **19(2)**, 87-93.

- 389 **Hotzy, C. and Arnqvist, G.** (2009). Sperm competition favors harmful males in seed  
390 beetles. *Current Biology*. **19**, 404-407.
- 391 **Hotzy, C., Polak, M., Rönn, J. L. and Arnqvist, G.** (2012). Phenotypic engineering  
392 unveils the function of genital morphology. *Current Biology*. **22(23)**, 2258-2261.
- 393 **Kamimura, Y.** (2010). Copulation anatomy of *Drosophila melanogaster* (Diptera:  
394 Drosophilidae): wound-making organs and their possible roles. *Zoomorphology*.  
395 **129(3)**, 163-174.
- 396 **Maklakov, A. A. and Arnqvist, G.** (2009). Testing for direct and indirect effects of  
397 mate choice by manipulating female choosiness. *Curr. Biol.* **19**, 1903–1906.
- 398 **Mbata, G. N., Shu, S. and Ramaswamy, S. B.** (1997). Rhythmicity of mating and  
399 oviposition in *Callosobruchus subinnotatus* (Pic)(Coleoptera: Bruchidae). *Journal of*  
400 *Insect Behavior*. **10(3)**, 409-423.
- 401 **Perry, J.C. and Rowe, L.** (2008). Ingested spermatophores accelerate reproduction  
402 and increase mating resistance but are not a source of sexual conflict. *Anim. Behav.*  
403 **76**, 993 – 1000.
- 404 **Rönn, J.L., Katvala, M. and Arnqvist, G.** (2006). The costs of mating and egg  
405 production in *Callosobruchus* seed beetles. *Animal Behaviour*. **72(2)**, 335-342.
- 406 **Rönn, J.L., Katvala, M. and Arnqvist, G.** (2007). Coevolution between harmful male  
407 genitalia and female resistance in seed beetles. *Proceedings of the National*  
408 *Academy of Sciences*. **104(26)**, 10921-10925.
- 409 **Rönn, J. L., Katvala, M. and Arnqvist, G.** (2008). Interspecific variation in ejaculate  
410 allocation and associated effects on female fitness in seed beetles. *Journal of*  
411 *evolutionary biology*. **21(2)**, 461-470.

- 412 **Sakurai, G., Himuro, C. and Kasuya, E.** (2012). Intra-specific variation in the  
413 morphology and the benefit of large genital sclerites of males in the adzuki bean  
414 beetle (*Callosobruchus chinensis*). *Journal of evolutionary biology*. **25(7)**, 1291-1297.
- 415 **Savalli, U.M. and Fox, C.W.** (1998). Sexual selection and the fit- ness  
416 consequences of male body size in the seed beetle *Stator limbatus*. *Anim. Behav.* **55**,  
417 473 – 483.
- 418 **Simmons, L.W.** (2001). *Sperm Competition and Its Evolutionary Consequences in*  
419 *the Insects*. Princeton University Press.
- 420 **Yamane, T., Goenaga, J., Rönn, J. L. and Arnqvist, G.** (2015). Male Seminal Fluid  
421 Substances Affect Sperm Competition Success and Female Reproductive Behavior  
422 in a Seed Beetle. *PLoS ONE*. **10(4)**, e0123770. doi:10.1371/journal.pone.0123770.
- 423
